# Supplementary material
Source: PubMed Central journal article supplement (PMC5858578)
Supplement: NIHMS948239-supplement-Supplemental_Materials.pdf [file NIHMS948239-supplement-Supplemental_Materials.pdf]

## SUPPLEMENTAL INFORMATION

### **Circadian misalignment increases C-reactive protein and blood pressure in chronic shift workers**

Christopher J. Morris<sup>1,2</sup>, Taylor E. Purvis<sup>1</sup>, Joseph Mistretta<sup>1</sup>, Kun Hu<sup>1,2</sup>, Frank A.J.L. Scheer<sup>1,2</sup>

<sup>1</sup>Medical Chronobiology Program, Division of Sleep and Circadian Disorders, Departments of Medicine and Neurology, Brigham and Women's Hospital, Boston, MA.

<sup>2</sup>Division of Sleep Medicine, Department of Medicine, Harvard Medical School, Boston, MA.

#### Supplemental figure

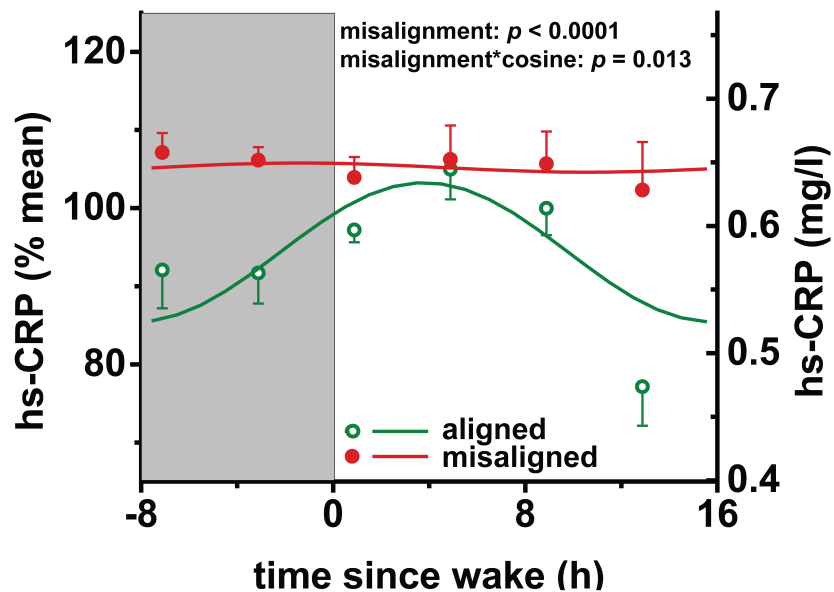

**Supplemental Figure 1. Cosine analysis of the effects of alignment condition on 24-h high-sensitivity C-reactive protein rhythms.** Cosine model estimates are shown as solid lines (green, aligned condition; red, misaligned condition). Open (aligned condition) and filled (misaligned condition) symbols represent data grouped relative to time since wake (data also shown in Figure 2). hs-CRP, high-sensitivity C-reactive protein; grey bar, sleep opportunity. Data are represented as mean±SEM.

## Supplemental tables

**Table 1. Estimates of fixed effects for 24-h high-sensitivity C-reactive protein**

| Parameter                    | Estimate | SE    | DF     | t-value | P-value |
|------------------------------|----------|-------|--------|---------|---------|
| Intercept                    | 6.236    | 0.259 | 6.288  | 24.050  | <0.0001 |
| Alignment                    |          |       |        |         |         |
| Aligned                      | -0.286   | 0.064 | 63.005 | -4.434  | <0.0001 |
| Misaligned (reference level) |          |       |        |         |         |
| TSW                          |          |       |        |         |         |
| -7.12 h                      | 0.059    | 0.061 | 63.002 | 0.964   | 0.339   |
| -3.12 h                      | 0.047    | 0.058 | 63.000 | 0.813   | 0.419   |
| 0.88 h                       | 0.025    | 0.058 | 63.000 | 0.431   | 0.668   |
| 4.88 h                       | 0.044    | 0.058 | 63.000 | 0.747   | 0.458   |
| 8.88 h                       | 0.039    | 0.058 | 63.000 | 0.670   | 0.505   |
| 12.88 h (reference level)    |          |       |        |         |         |
| Alignment*TSW                |          |       |        |         |         |
| Aligned, -7.12 h             | 0.125    | 0.089 | 63.003 | 1.412   | 0.163   |
| Aligned, -3.12 h             | 0.135    | 0.087 | 63.003 | 1.547   | 0.127   |
| Aligned, 0.88 h              | 0.220    | 0.087 | 63.003 | 2.531   | 0.014   |
| Aligned, 4.88 h              | 0.275    | 0.087 | 63.003 | 3.166   | 0.002   |
| Aligned, 8.88 h              | 0.232    | 0.087 | 63.003 | 2.663   | 0.010   |

Mixed-effects model was fitted with alignment, time since wake (TSW) and their interaction (alignment\*TSW) as fixed effects and subject as random effect. SE, standard error; DF, degrees of freedom.

**Table 2. Estimates of covariance parameters for 24-h high-sensitivity C-reactive protein**

| <b>Parameter</b>                 | <b>Estimate</b> | <b>SE</b> | <b>Wald Z</b> | <b>P-value</b> |
|----------------------------------|-----------------|-----------|---------------|----------------|
| Residual                         | 0.012           | 0.002     | 5.613         | <0.0001        |
| Intercept (participant) variance | 0.459           | 0.265     | 1.728         | 0.084          |

SE, standard error; DF, degrees of freedom

**Table 3. Estimates of fixed effects for 24-h systolic blood pressure**

| Parameter                    | Estimate | SE    | DF      | t-value | P-value |
|------------------------------|----------|-------|---------|---------|---------|
| Intercept                    | 4.591    | 0.042 | 9.521   | 108.975 | <0.0001 |
| Alignment                    |          |       |         |         |         |
| Aligned                      | -0.024   | 0.028 | 606.003 | -0.852  | 0.394   |
| Misaligned (reference level) |          |       |         |         |         |
| TSW                          |          |       |         |         |         |
| 0.5 h                        | 0.123    | 0.025 | 606.000 | 4.893   | <0.0001 |
| 1.5 h                        | 0.146    | 0.027 | 605.998 | 5.337   | <0.0001 |
| 2.5 h                        | 0.105    | 0.026 | 606.009 | 4.075   | <0.0001 |
| 3.5 h                        | 0.096    | 0.029 | 606.014 | 3.284   | 0.001   |
| 4.5 h                        | 0.150    | 0.027 | 606.010 | 5.645   | <0.0001 |
| 5.5 h                        | 0.132    | 0.026 | 606.005 | 5.039   | <0.0001 |
| 7.5 h                        | 0.122    | 0.027 | 605.998 | 4.447   | <0.0001 |
| 8.5 h                        | 0.131    | 0.027 | 605.998 | 4.778   | <0.0001 |
| 9.5 h                        | 0.128    | 0.028 | 606.001 | 4.596   | <0.0001 |
| 10.5 h                       | 0.106    | 0.028 | 606.001 | 3.797   | <0.0001 |
| 11.5 h                       | 0.125    | 0.027 | 606.025 | 4.565   | <0.0001 |
| 12.5 h                       | 0.142    | 0.026 | 606.009 | 5.510   | <0.0001 |
| 13.5 h                       | 0.128    | 0.030 | 606.006 | 4.251   | <0.0001 |
| 14.5 h                       | 0.127    | 0.025 | 606.007 | 5.092   | <0.0001 |
| 15.5 h                       | 0.125    | 0.027 | 606.002 | 4.716   | <0.0001 |
| 16.5 h                       | 0.057    | 0.028 | 606.001 | 2.026   | 0.043   |
| 17.5 h                       | 0.014    | 0.028 | 606.001 | 0.501   | 0.616   |
| 18.5 h                       | -0.013   | 0.028 | 606.001 | -0.453  | 0.650   |
| 19.5 h                       | -0.001   | 0.028 | 606.001 | -0.025  | 0.980   |
| 20.5 h                       | -0.071   | 0.027 | 605.998 | -2.600  | 0.010   |
| 21.5 h                       | -0.008   | 0.028 | 606.001 | -0.297  | 0.766   |
| 22.5 h                       | 0.000    | 0.028 | 606.001 | 0.011   | 0.991   |
| 23.5 h (reference level)     |          |       |         |         |         |
| Alignment*TSW                |          |       |         |         |         |
| Aligned, 0.5 h               | 0.017    | 0.038 | 606.010 | 0.446   | 0.656   |
| Aligned, 1.5 h               | 0.032    | 0.039 | 606.001 | 0.811   | 0.417   |
| Aligned, 2.5 h               | 0.047    | 0.038 | 606.004 | 1.248   | 0.212   |
| Aligned, 3.5 h               | -0.009   | 0.042 | 606.026 | -0.217  | 0.828   |
| Aligned, 4.5 h               | -0.010   | 0.038 | 606.002 | -0.255  | 0.799   |
| Aligned, 5.5 h               | 0.035    | 0.038 | 606.009 | 0.919   | 0.359   |

|                 |        |       |         |        |       |
|-----------------|--------|-------|---------|--------|-------|
| Aligned, 7.5 h  | -0.011 | 0.039 | 606.004 | -0.275 | 0.783 |
| Aligned, 8.5 h  | -0.030 | 0.040 | 606.006 | -0.743 | 0.458 |
| Aligned, 9.5 h  | -0.011 | 0.040 | 606.007 | -0.280 | 0.779 |
| Aligned, 10.5 h | 0.027  | 0.041 | 606.006 | 0.655  | 0.513 |
| Aligned, 11.5 h | 0.004  | 0.040 | 606.007 | 0.093  | 0.926 |
| Aligned, 12.5 h | -0.014 | 0.037 | 606.009 | -0.375 | 0.708 |
| Aligned, 13.5 h | 0.061  | 0.043 | 606.008 | 1.431  | 0.153 |
| Aligned, 14.5 h | -0.003 | 0.036 | 606.005 | -0.075 | 0.941 |
| Aligned, 15.5 h | 0.003  | 0.038 | 606.003 | 0.072  | 0.942 |
| Aligned, 16.5 h | 0.001  | 0.041 | 606.007 | 0.022  | 0.983 |
| Aligned, 17.5 h | 0.012  | 0.041 | 606.003 | 0.306  | 0.760 |
| Aligned, 18.5 h | -0.007 | 0.041 | 606.003 | -0.180 | 0.857 |
| Aligned, 19.5 h | -0.021 | 0.040 | 606.001 | -0.521 | 0.603 |
| Aligned, 20.5 h | 0.071  | 0.040 | 606.008 | 1.762  | 0.079 |
| Aligned, 21.5 h | 0.036  | 0.041 | 606.000 | 0.895  | 0.371 |
| Aligned, 22.5 h | -0.004 | 0.041 | 606.000 | -0.087 | 0.931 |

---

Mixed-effects model was fitted with alignment, time since wake (TSW) and their interaction (alignment\*TSW) as fixed effects and subject as random effect. SE, standard error; DF, degrees of freedom.

**Table 4. Estimates of covariance parameters for 24-h systolic blood pressure**

| <b>Parameter</b>                 | <b>Estimate</b> | <b>SE</b> | <b>Wald Z</b> | <b>P-value</b> |
|----------------------------------|-----------------|-----------|---------------|----------------|
| Residual                         | 0.005           | 0.000     | 17.407        | <0.0001        |
| Intercept (participant) variance | 0.010           | 0.006     | 1.722         | 0.085          |

SE, standard error; DF, degrees of freedom

**Table 5. Estimates of fixed effects for 24-h diastolic blood pressure**

| Parameter                    | Estimate | SE    | DF      | t-value | P-value |
|------------------------------|----------|-------|---------|---------|---------|
| Intercept                    | 4.135    | 0.041 | 13.192  | 99.956  | <0.0001 |
| Alignment                    |          |       |         |         |         |
| Aligned                      | -0.048   | 0.035 | 606.008 | -1.355  | 0.176   |
| Misaligned (reference level) |          |       |         |         |         |
| TSW                          |          |       |         |         |         |
| 0.5 h                        | 0.181    | 0.031 | 606.001 | 5.817   | <0.0001 |
| 1.5 h                        | 0.112    | 0.034 | 605.998 | 3.317   | 0.001   |
| 2.5 h                        | 0.066    | 0.032 | 606.018 | 2.083   | 0.038   |
| 3.5 h                        | 0.064    | 0.036 | 606.027 | 1.783   | 0.075   |
| 4.5 h                        | 0.137    | 0.033 | 606.021 | 4.185   | <0.0001 |
| 5.5 h                        | 0.111    | 0.032 | 606.011 | 3.434   | 0.001   |
| 7.5 h                        | 0.132    | 0.034 | 605.998 | 3.921   | <0.0001 |
| 8.5 h                        | 0.169    | 0.034 | 605.998 | 5.013   | <0.0001 |
| 9.5 h                        | 0.137    | 0.034 | 606.003 | 3.985   | <0.0001 |
| 10.5 h                       | 0.171    | 0.034 | 606.003 | 4.956   | <0.0001 |
| 11.5 h                       | 0.156    | 0.034 | 606.049 | 4.604   | <0.0001 |
| 12.5 h                       | 0.168    | 0.032 | 606.018 | 5.269   | <0.0001 |
| 13.5 h                       | 0.097    | 0.037 | 606.012 | 2.630   | 0.009   |
| 14.5 h                       | 0.086    | 0.031 | 606.015 | 2.770   | 0.006   |
| 15.5 h                       | 0.082    | 0.033 | 606.004 | 2.491   | 0.013   |
| 16.5 h                       | -0.024   | 0.034 | 606.004 | -0.705  | 0.481   |
| 17.5 h                       | -0.091   | 0.034 | 606.004 | -2.629  | 0.009   |
| 18.5 h                       | -0.054   | 0.034 | 606.004 | -1.553  | 0.121   |
| 19.5 h                       | -0.034   | 0.034 | 606.004 | -0.987  | 0.324   |
| 20.5 h                       | -0.078   | 0.034 | 605.998 | -2.309  | 0.021   |
| 21.5 h                       | -0.024   | 0.034 | 606.004 | -0.683  | 0.495   |
| 22.5 h                       | -0.067   | 0.034 | 606.004 | -1.945  | 0.052   |
| 23.5 h (reference level)     |          |       |         |         |         |
| Alignment*TSW                |          |       |         |         |         |
| Aligned, 0.5 h               | -0.016   | 0.047 | 606.021 | -0.344  | 0.731   |
| Aligned, 1.5 h               | 0.073    | 0.048 | 606.003 | 1.507   | 0.132   |
| Aligned, 2.5 h               | 0.064    | 0.047 | 606.008 | 1.367   | 0.172   |
| Aligned, 3.5 h               | 0.063    | 0.052 | 606.050 | 1.214   | 0.225   |
| Aligned, 4.5 h               | 0.038    | 0.047 | 606.004 | 0.819   | 0.413   |
| Aligned, 5.5 h               | 0.065    | 0.046 | 606.019 | 1.390   | 0.165   |

|                 |        |       |         |        |       |
|-----------------|--------|-------|---------|--------|-------|
| Aligned, 7.5 h  | 0.036  | 0.048 | 606.008 | 0.737  | 0.461 |
| Aligned, 8.5 h  | 0.036  | 0.050 | 606.012 | 0.726  | 0.468 |
| Aligned, 9.5 h  | 0.064  | 0.050 | 606.015 | 1.280  | 0.201 |
| Aligned, 10.5 h | 0.042  | 0.050 | 606.012 | 0.827  | 0.408 |
| Aligned, 11.5 h | 0.074  | 0.050 | 606.014 | 1.486  | 0.138 |
| Aligned, 12.5 h | 0.039  | 0.046 | 606.018 | 0.847  | 0.397 |
| Aligned, 13.5 h | 0.098  | 0.053 | 606.017 | 1.857  | 0.064 |
| Aligned, 14.5 h | 0.031  | 0.045 | 606.011 | 0.684  | 0.494 |
| Aligned, 15.5 h | 0.004  | 0.047 | 606.008 | 0.078  | 0.938 |
| Aligned, 16.5 h | 0.005  | 0.050 | 606.014 | 0.102  | 0.919 |
| Aligned, 17.5 h | 0.003  | 0.050 | 606.008 | 0.069  | 0.945 |
| Aligned, 18.5 h | 0.003  | 0.050 | 606.007 | 0.054  | 0.957 |
| Aligned, 19.5 h | -0.063 | 0.049 | 606.004 | -1.286 | 0.199 |
| Aligned, 20.5 h | 0.017  | 0.050 | 606.017 | 0.333  | 0.740 |
| Aligned, 21.5 h | 0.020  | 0.050 | 606.001 | 0.393  | 0.694 |
| Aligned, 22.5 h | 0.065  | 0.050 | 606.001 | 1.291  | 0.197 |

---

Mixed-effects model was fitted with alignment, time since wake (TSW) and their interaction (alignment\*TSW) as fixed effects and subject as random effect. SE, standard error; DF, degrees of freedom.



**Table 6. Estimates of covariance parameters for 24-h diastolic blood pressure**

| <b>Parameter</b>                 | <b>Estimate</b> | <b>SE</b> | <b>Wald Z</b> | <b>P-value</b> |
|----------------------------------|-----------------|-----------|---------------|----------------|
| Residual                         | 0.008           | 0.000     | 17.407        | <0.0001        |
| Intercept (participant) variance | 0.008           | 0.005     | 1.713         | 0.087          |

SE, standard error; DF, degrees of freedom
